# Supplementary material
Source: publisher figshare collection journal article supplement (https://frontiersin.figshare.com/ndownloader/files/13542866)
Supplement: Supplementary file [file 13542866]

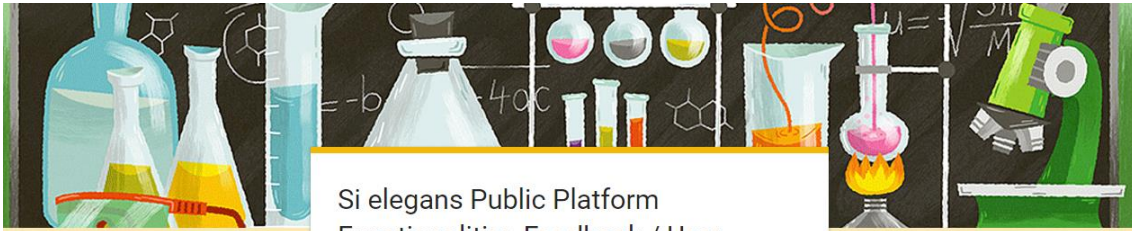

## Si elegans Public Platform Functionalities Feedback / User Experience Assessment

We would love to hear your thoughts or feedback on how we can improve your experience!

\* Required

### Responder details

Name

Your answer

Email

Your answer

Would you be willing to be contacted for further functionality discussion? \*

☐ Yes

☐ No

NEXT

Page 1 of 12

Never submit passwords through Google Forms.

## Neuron Model Design

Please provide us with specific feedback on neuron model design tools

[https://platform.si-elegans.eu/booking/view\\_NeuronModels](https://platform.si-elegans.eu/booking/view_NeuronModels)

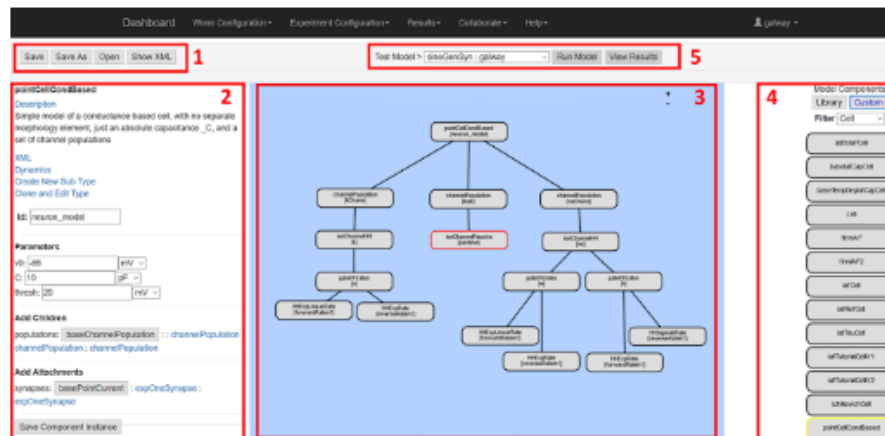

## Functionality Feedback

Your answer

## Evaluate Possible Future Functionalities

Improve the testing methods for neurons under development

|               | 1                     | 2                     | 3                     | 4                     | 5                     |                |
|---------------|-----------------------|-----------------------|-----------------------|-----------------------|-----------------------|----------------|
| Not Important | <input type="radio"/> | <input type="radio"/> | <input type="radio"/> | <input type="radio"/> | <input type="radio"/> | Very Important |

Expand library of neuron models to include non-electrical models (not ion-based or voltage-based) abstract models

|               | 1                     | 2                     | 3                     | 4                     | 5                     |                |
|---------------|-----------------------|-----------------------|-----------------------|-----------------------|-----------------------|----------------|
| Not Important | <input type="radio"/> | <input type="radio"/> | <input type="radio"/> | <input type="radio"/> | <input type="radio"/> | Very Important |

## Suggestions for Other Functionalities

Your answer

## Neuron Network Configuration

Please provide us with specific feedback on neuron network configuration tool

[https://platform.si-elegans.eu/booking/view\\_NeuralNetworks](https://platform.si-elegans.eu/booking/view_NeuralNetworks)

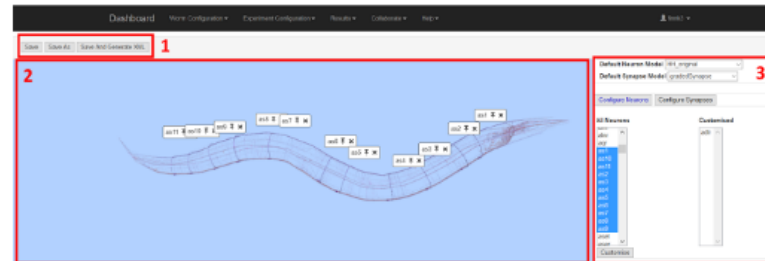

## Functionality Feedback

Your answer

## Evaluate Possible Future Functionalities

Enable selection of subnetworks for configuration

|               | 1                     | 2                     | 3                     | 4                     | 5                     |                |
|---------------|-----------------------|-----------------------|-----------------------|-----------------------|-----------------------|----------------|
| Not Important | <input type="radio"/> | <input type="radio"/> | <input type="radio"/> | <input type="radio"/> | <input type="radio"/> | Very Important |

Allow for the running of a network without a physics engine (standalone simulations)

|               | 1                     | 2                     | 3                     | 4                     | 5                     |                |
|---------------|-----------------------|-----------------------|-----------------------|-----------------------|-----------------------|----------------|
| Not Important | <input type="radio"/> | <input type="radio"/> | <input type="radio"/> | <input type="radio"/> | <input type="radio"/> | Very Important |

Suggestions for Other Functionalities

Your answer

## Behavioural Experiment Design

Please provide us with specific feedback on behavioural experiment design tool

[https://platform.sielegans.eu/behaviouralExperimentDefinition/experimentDefinition\\_Selection](https://platform.sielegans.eu/behaviouralExperimentDefinition/experimentDefinition_Selection)

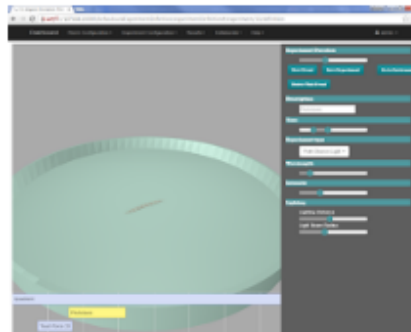

### Functionality Feedback

Your answer

## Evaluate Possible Future Functionalities

Improve Experiment Definition 3D Realism - e.g. specify interaction are by clicking on the worm

|               | 1                     | 2                     | 3                     | 4                     | 5                     |                |
|---------------|-----------------------|-----------------------|-----------------------|-----------------------|-----------------------|----------------|
| Not Important | <input type="radio"/> | <input type="radio"/> | <input type="radio"/> | <input type="radio"/> | <input type="radio"/> | Very Important |

Richer Behavioural Repertoire

|               | 1                     | 2                     | 3                     | 4                     | 5                     |                |
|---------------|-----------------------|-----------------------|-----------------------|-----------------------|-----------------------|----------------|
| Not Important | <input type="radio"/> | <input type="radio"/> | <input type="radio"/> | <input type="radio"/> | <input type="radio"/> | Very Important |

Allow for Direct Stimuli Specification to Neuron

|               | 1                     | 2                     | 3                     | 4                     | 5                     |                |
|---------------|-----------------------|-----------------------|-----------------------|-----------------------|-----------------------|----------------|
| Not Important | <input type="radio"/> | <input type="radio"/> | <input type="radio"/> | <input type="radio"/> | <input type="radio"/> | Very Important |

Suggestions for Other Functionalities

Your answer

## Locomotion Results Visualization

Please provide us with specific feedback on locomotion results visualization

[https://platform.si-elegans.eu/booking/view\\_PE\\_results](https://platform.si-elegans.eu/booking/view_PE_results)

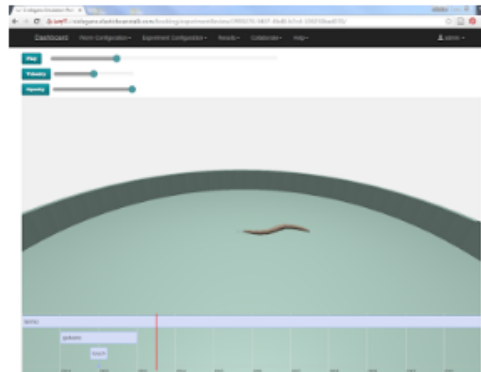

## Functionality Feedback

Your answer

## Evaluate Possible Future Functionalities

Represent Virtual Experimenter Behavioural Interactions - 3D Realism

|               | 1                     | 2                     | 3                     | 4                     | 5                     |                |
|---------------|-----------------------|-----------------------|-----------------------|-----------------------|-----------------------|----------------|
| Not Important | <input type="radio"/> | <input type="radio"/> | <input type="radio"/> | <input type="radio"/> | <input type="radio"/> | Very Important |

Visualise Muscles Contraction and Relaxation

|               | 1                     | 2                     | 3                     | 4                     | 5                     |                |
|---------------|-----------------------|-----------------------|-----------------------|-----------------------|-----------------------|----------------|
| Not Important | <input type="radio"/> | <input type="radio"/> | <input type="radio"/> | <input type="radio"/> | <input type="radio"/> | Very Important |

Suggestions for Other Functionalities

Your answer

## Neuron Results Visualization

Please provide us with specific feedback on Neuron Results Visualization

[https://platform.si-elegans.eu/booking/view\\_RB\\_results](https://platform.si-elegans.eu/booking/view_RB_results)

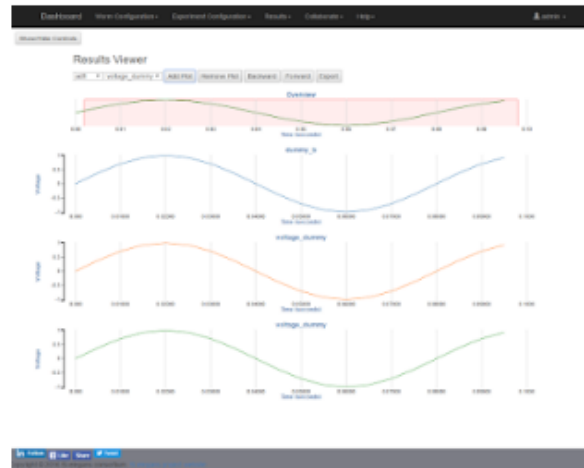

## Functionality Feedback

Your answer

## Evaluate Possible Future Functionalities

Enable export to HDF5 format

1 2 3 4 5

Not Important

☐ ☐ ☐ ☐ ☐

Very  
Important

Enable macro analytics (activity graphs and PCA)

1 2 3 4 5

Not Important

☐ ☐ ☐ ☐ ☐

Very  
Important

Suggestions for Other Functionalities

Your answer

## Integrated Results Visualization

Please provide us with specific feedback on the Integrated Results Visualization

[https://platform.si-elegans.eu/booking/view\\_integrated\\_results](https://platform.si-elegans.eu/booking/view_integrated_results)

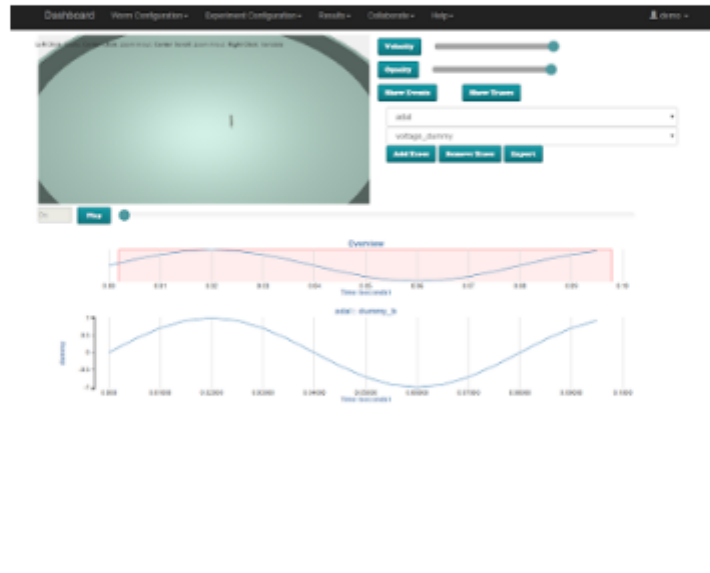

## Functionality Feedback

Your answer

### Evaluate Possible Future Functionalities

Enable export to HDF5 format

1 2 3 4 5

Not Important

☐ ☐ ☐ ☐ ☐

Very  
Important

Enable macro analytics (activity graphs and PCA)

1 2 3 4 5

Not Important

☐ ☐ ☐ ☐ ☐

Very  
Important

Suggestions for Other Functionalities

Your answer

## General Usability - Usefulness Feedback

Please provide us some feedback from a general perspective

Do you prioritise execution time of your tools over usability on your daily use tools?

|                   | 1                     | 2                     | 3                     | 4                     | 5                     |                |
|-------------------|-----------------------|-----------------------|-----------------------|-----------------------|-----------------------|----------------|
| Strongly Disagree | <input type="radio"/> | <input type="radio"/> | <input type="radio"/> | <input type="radio"/> | <input type="radio"/> | Strongly Agree |

Please provide us with a general feedback on our GUIs

Your answer

---

Do you require the ability to simulate sub networks of the connectome?

- ☐ Yes
- ☐ No

Would you make experiment in a in-silico emulation platform like Si elegans

- ☐ Yes
- ☐ No

Would you trust to do your experiments on an online platform or would you rather verify them locally?

|              | 1                     | 2                     | 3                     | 4                     | 5                     |             |
|--------------|-----------------------|-----------------------|-----------------------|-----------------------|-----------------------|-------------|
| Locally only | <input type="radio"/> | <input type="radio"/> | <input type="radio"/> | <input type="radio"/> | <input type="radio"/> | Online only |

If yes,... Please specify which usage you would give to this platform

Your answer

---

If not, ...Please tell us what you're missing. (e.g Which general functionality you're missing.)

Your answer
